# Supplementary material for: An S/T-Q cluster domain census unveils new putative targets under Tel1/Mec1 control
Source: PubMed Central journal article supplement (PMC3564818; doi:10.1186/1471-2164-13-664), 2012-11-23

Additional Figure S1: GO-Slim ontology terms associated with the 436 yeast SCD proteins

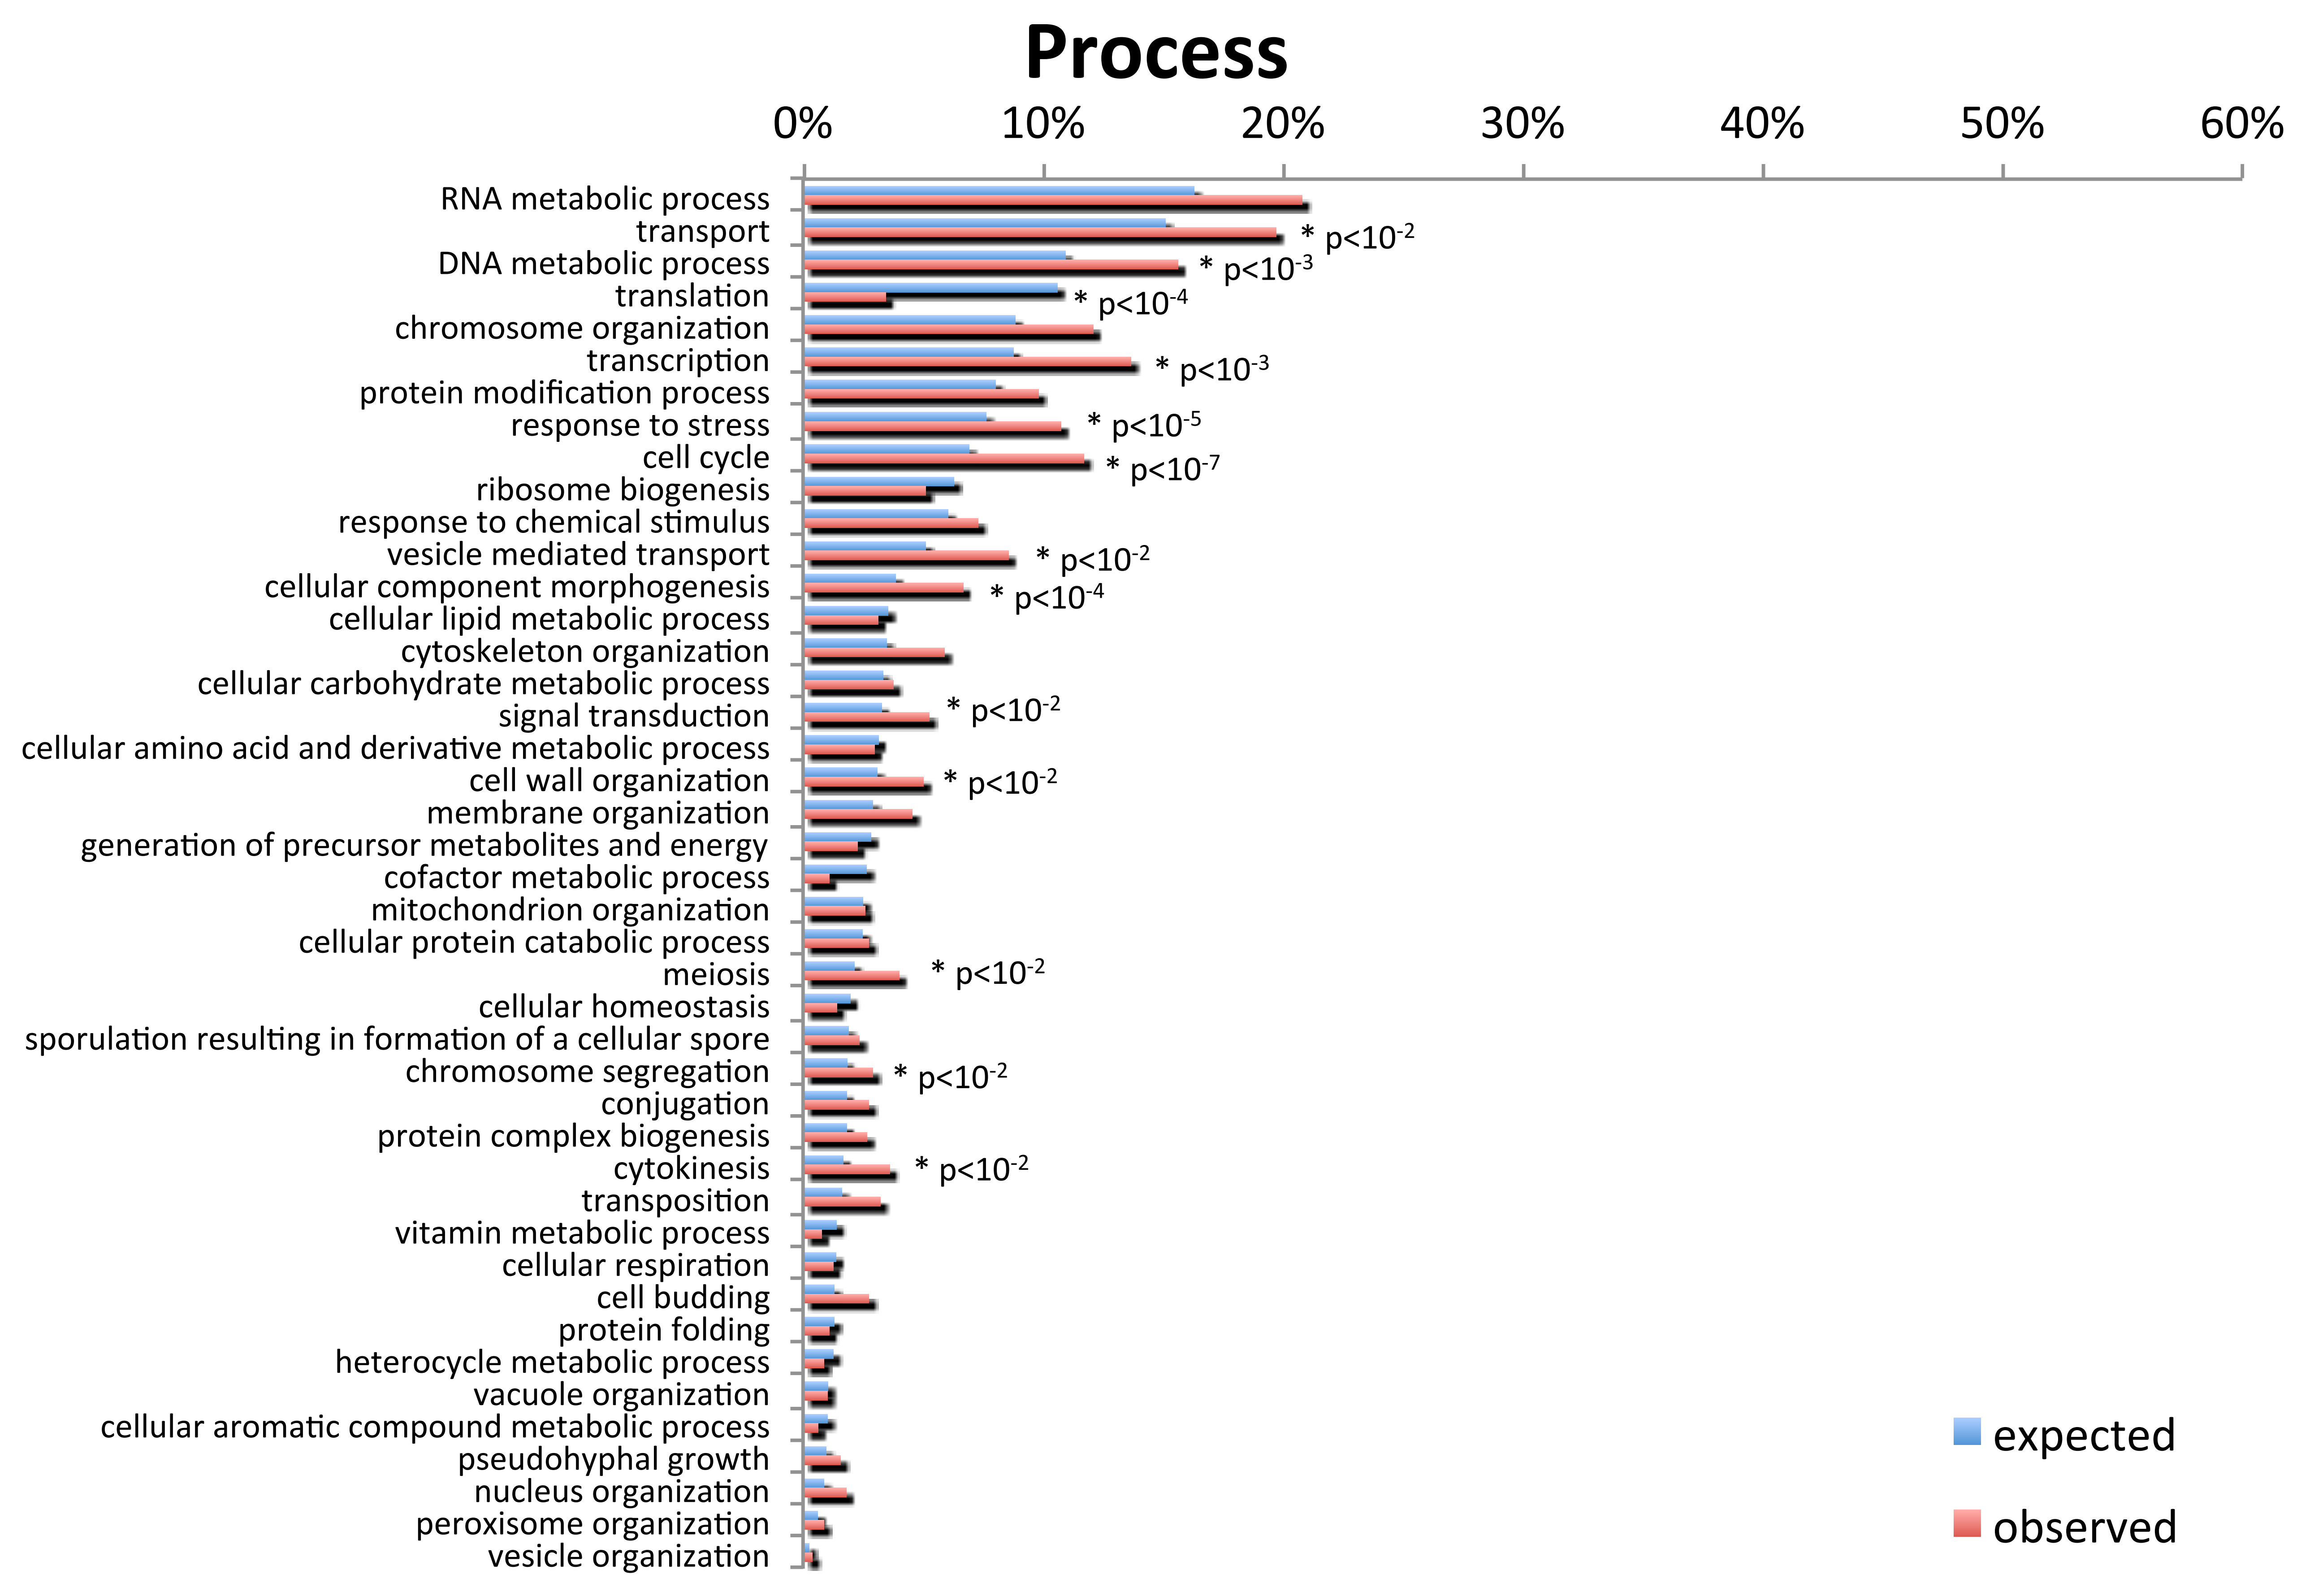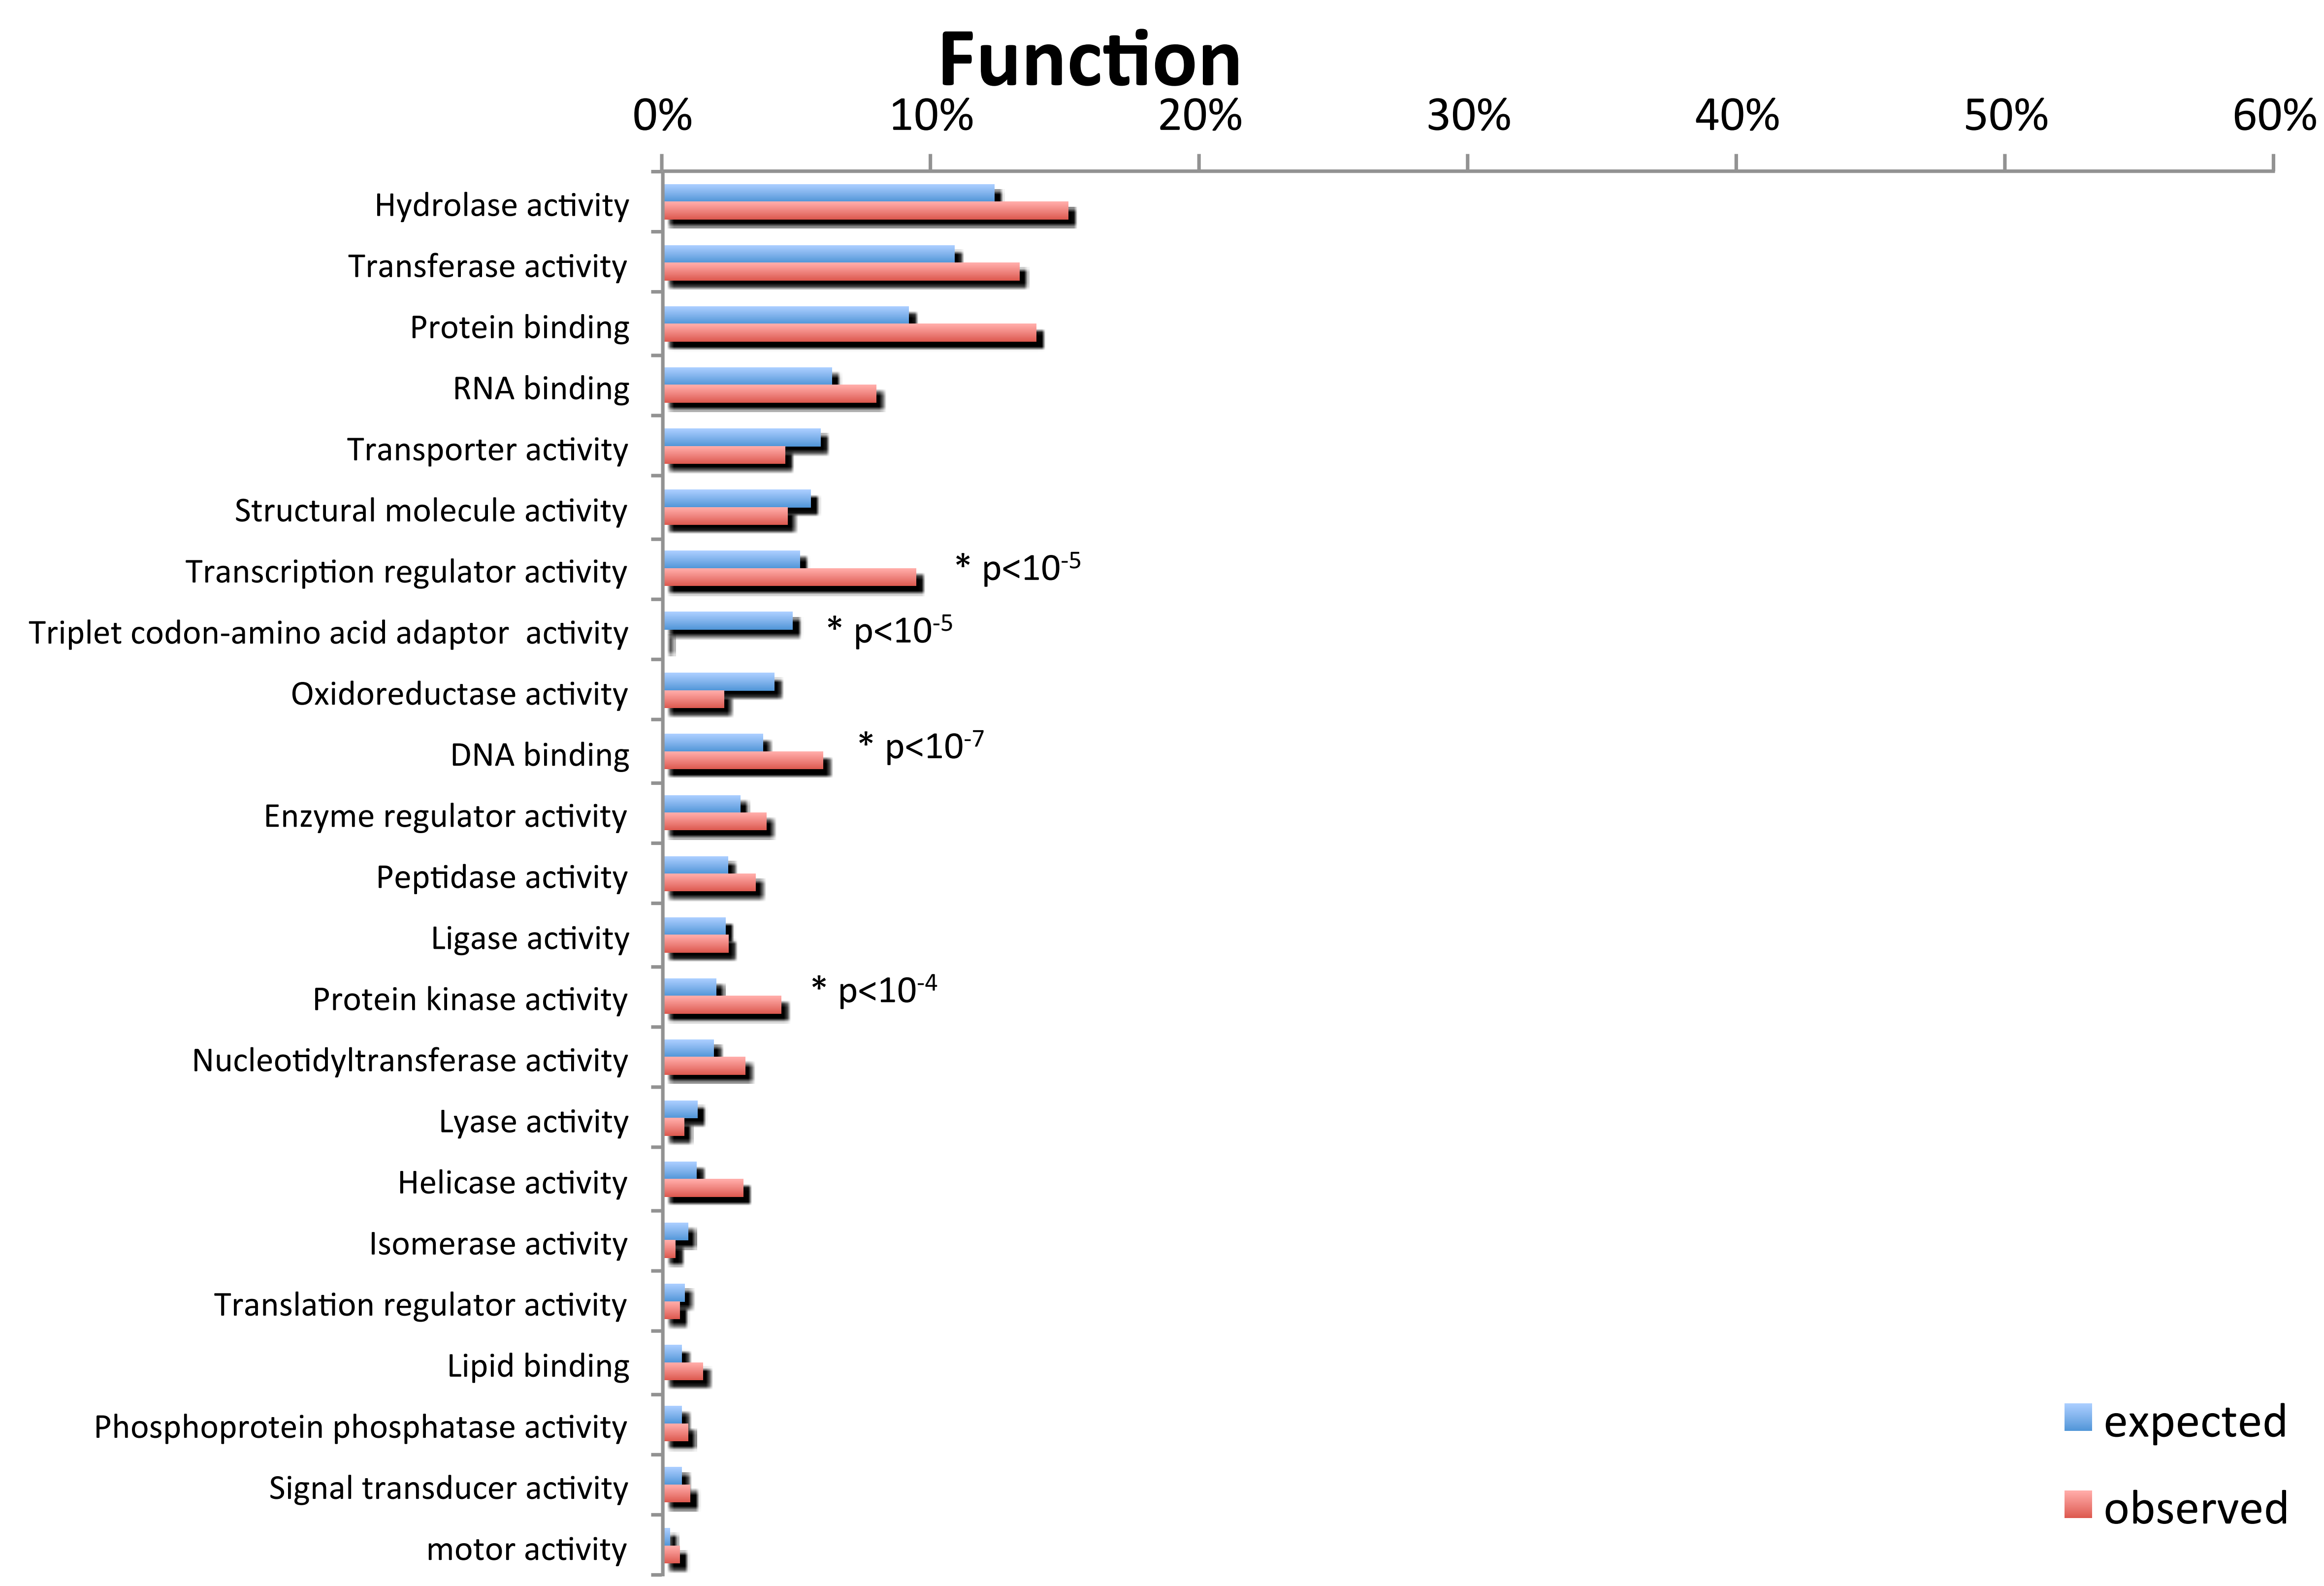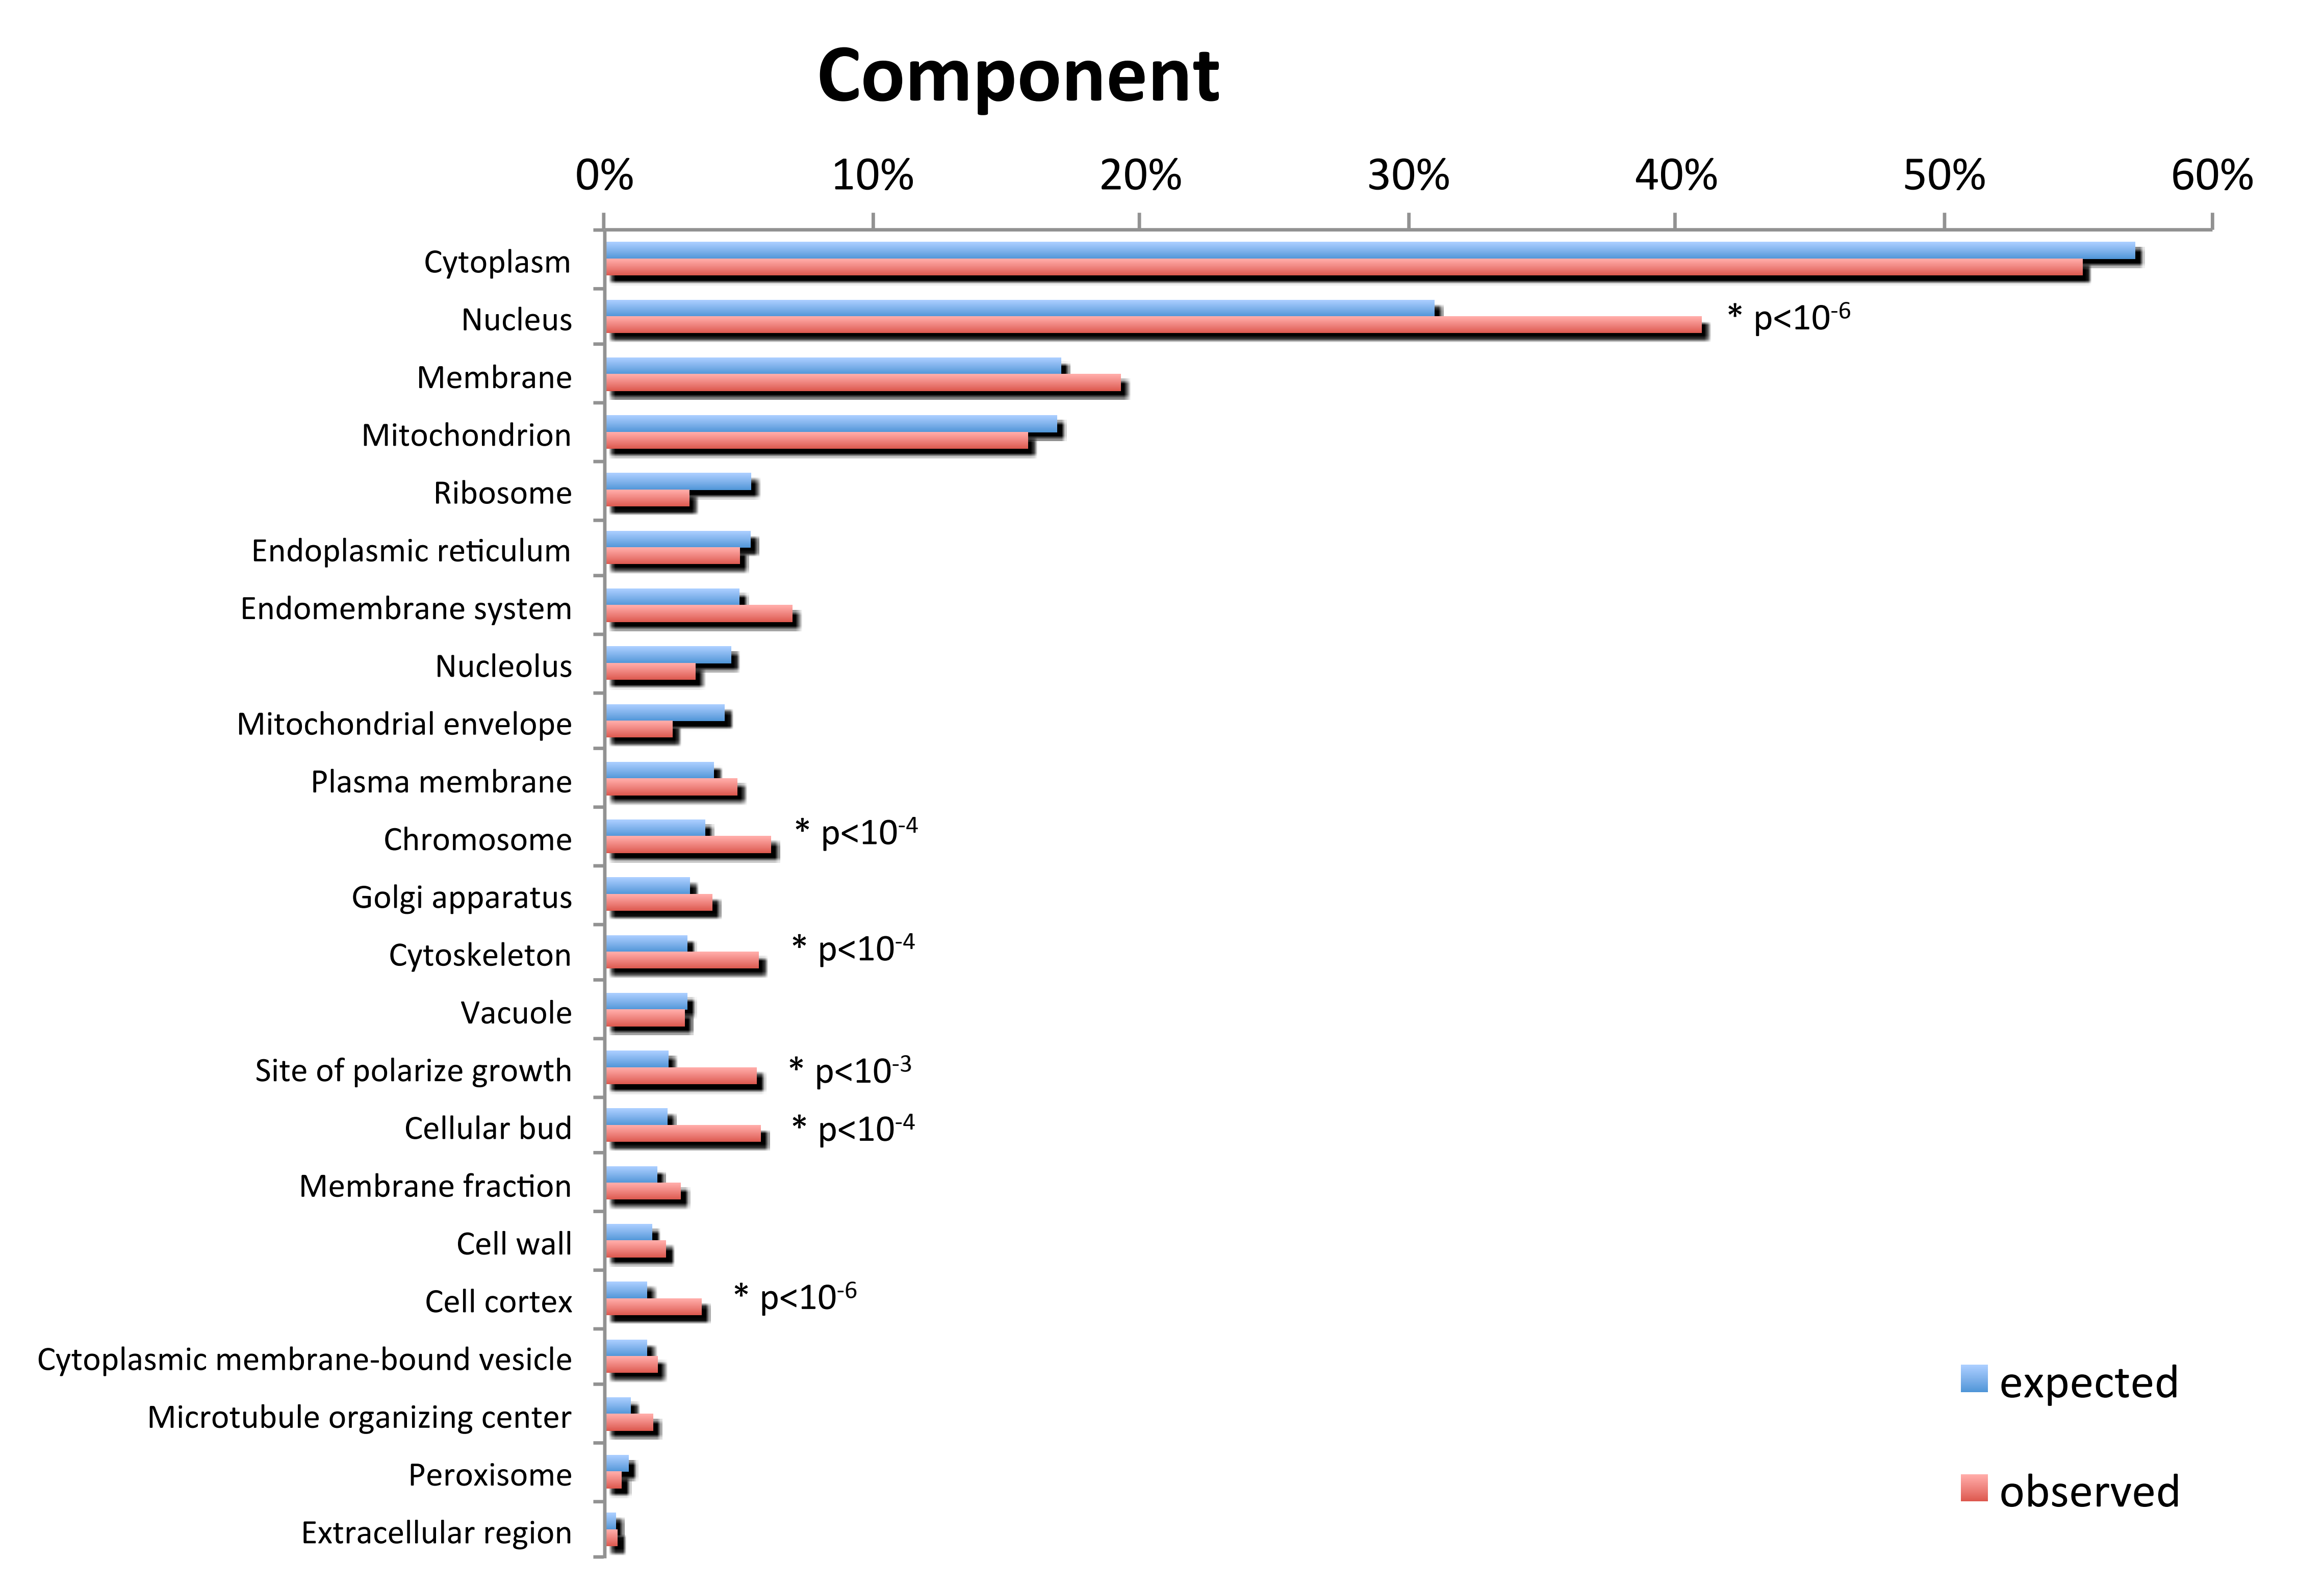

Supplement: 1471-2164-13-664-S5.pdf [file 1471-2164-13-664-S5.pdf]
